# Supplementary material
Source: Research Square preprint supplement (doi:10.21203/rs.3.rs-8663278/v1)
Supplement: Supplementary file 1 [file 337ece9578c1fd0f2428227d.docx]

| Table 3. Weighted Multivariate Logistic Regression Predicting Missing Needed Mental Health Treatment Among the Total Population | | | | | | | | | | | |
| --- | --- | --- | --- | --- | --- | --- | --- | --- | --- | --- | --- |
|  | Model 1 | Model 2 | Model 3 | Model 4 | Model 5 | Model 6 | Model 7 | Model 8 | Model 9 | Model 10 | Model 11 |
| Age | -0.148*** | -0.0605*** | -0.0603*** | -0.147*** | -0.0606*** | -0.0603*** | -0.0605*** | -0.0607*** | -0.0606*** | -0.0607*** | -0.0604*** |
|  | (0.00437) | (0.00668) | (0.00668) | (0.00434) | (0.00661) | (0.00660) | (0.00662) | (0.00661) | (0.00662) | (0.00664) | (0.00664) |
|  |  |  |  |  |  |  |  |  |  |  |  |
| Education | 0.139*** | 0.186*** | 0.186*** | 0.140*** | 0.186*** | 0.185*** | 0.186*** | 0.186*** | 0.186*** | 0.186*** | 0.186*** |
|  | (0.0108) | (0.0149) | (0.0150) | (0.0108) | (0.0151) | (0.0151) | (0.0151) | (0.0151) | (0.0151) | (0.0151) | (0.0151) |
|  |  |  |  |  |  |  |  |  |  |  |  |
| Family Income | -0.130*** | -0.0662*** | -0.0662*** | -0.130*** | -0.0661*** | -0.0658*** | -0.0661*** | -0.0661*** | -0.0661*** | -0.0661*** | -0.0661*** |
|  | (0.00568) | (0.00738) | (0.00737) | (0.00566) | (0.00738) | (0.00739) | (0.00738) | (0.00738) | (0.00738) | (0.00738) | (0.00738) |
|  |  |  |  |  |  |  |  |  |  |  |  |
| aWomen | 0.958*** | 0.498*** | 0.499*** | 0.953*** | 0.497*** | 0.498*** | 0.497*** | 0.497*** | 0.497*** | 0.497*** | 0.497*** |
|  | (0.0251) | (0.0295) | (0.0294) | (0.0250) | (0.0293) | (0.0293) | (0.0293) | (0.0293) | (0.0293) | (0.0293) | (0.0293) |
|  |  |  |  |  |  |  |  |  |  |  |  |
| bMarried | -0.208*** | -0.0716* | -0.0716* | -0.209*** | -0.0717* | -0.0721* | -0.0720* | -0.0717* | -0.0718* | -0.0717* | -0.0716* |
|  | (0.0265) | (0.0351) | (0.0350) | (0.0266) | (0.0352) | (0.0351) | (0.0351) | (0.0352) | (0.0351) | (0.0352) | (0.0351) |
|  |  |  |  |  |  |  |  |  |  |  |  |
| Divorced | -0.443*** | -0.250** | -0.249** | -0.443*** | -0.249** | -0.248** | -0.249** | -0.249** | -0.249** | -0.250** | -0.249** |
|  | (0.0662) | (0.0927) | (0.0928) | (0.0662) | (0.0928) | (0.0929) | (0.0928) | (0.0928) | (0.0928) | (0.0928) | (0.0928) |
|  |  |  |  |  |  |  |  |  |  |  |  |
| Widowed | 0.166*** | 0.0742† | 0.0735† | 0.166*** | 0.0742† | 0.0727† | 0.0738† | 0.0743† | 0.0740† | 0.0742† | 0.0737† |
|  | (0.0287) | (0.0376) | (0.0376) | (0.0289) | (0.0377) | (0.0376) | (0.0377) | (0.0377) | (0.0377) | (0.0377) | (0.0377) |
|  |  |  |  |  |  |  |  |  |  |  |  |
| cBlack | -0.0927** | 0.0961* | 0.0957* | -0.0945** | 0.0961* | 0.0961* | 0.0962* | 0.0961* | 0.0961* | 0.0962* | 0.0959* |
|  | (0.0337) | (0.0439) | (0.0440) | (0.0337) | (0.0438) | (0.0439) | (0.0439) | (0.0438) | (0.0438) | (0.0438) | (0.0439) |
|  |  |  |  |  |  |  |  |  |  |  |  |
| Hispanic | -0.122*** | -0.0875* | -0.0882* | -0.123*** | -0.0877* | -0.0880* | -0.0880* | -0.0877* | -0.0877* | -0.0876* | -0.0883* |
|  | (0.0325) | (0.0410) | (0.0410) | (0.0325) | (0.0410) | (0.0409) | (0.0410) | (0.0410) | (0.0410) | (0.0410) | (0.0409) |
|  |  |  |  |  |  |  |  |  |  |  |  |
| Asian | -0.289*** | -0.236** | -0.235** | -0.290*** | -0.236** | -0.235** | -0.235** | -0.236** | -0.236** | -0.236** | -0.235** |
|  | (0.0669) | (0.0817) | (0.0818) | (0.0669) | (0.0820) | (0.0822) | (0.0821) | (0.0818) | (0.0820) | (0.0820) | (0.0821) |
|  |  |  |  |  |  |  |  |  |  |  |  |
| Native American | 0.0545 | -0.0128 | -0.0118 | 0.0601 | -0.0162 | -0.0114 | -0.0145 | -0.0162 | -0.0162 | -0.0172 | -0.0164 |
|  | (0.0974) | (0.137) | (0.136) | (0.0974) | (0.137) | (0.137) | (0.137) | (0.137) | (0.137) | (0.138) | (0.137) |
|  |  |  |  |  |  |  |  |  |  |  |  |
| Hawaiian/Pacific I | -0.864*** | -1.120*** | -1.120*** | -0.867*** | -1.122*** | -1.118*** | -1.123*** | -1.122*** | -1.122*** | -1.122*** | -1.123*** |
|  | (0.191) | (0.231) | (0.231) | (0.192) | (0.231) | (0.230) | (0.231) | (0.231) | (0.231) | (0.231) | (0.231) |
|  |  |  |  |  |  |  |  |  |  |  |  |
| Multi Racial | 0.245*** | 0.168* | 0.167* | 0.247*** | 0.167* | 0.167* | 0.167* | 0.167* | 0.168* | 0.168* | 0.167* |
|  | (0.0601) | (0.0726) | (0.0726) | (0.0601) | (0.0724) | (0.0724) | (0.0724) | (0.0724) | (0.0725) | (0.0725) | (0.0724) |
|  |  |  |  |  |  |  |  |  |  |  |  |
| Religious Salience | -0.0295*** | -0.0203*** | -0.0202*** | -0.0296*** | -0.0203*** | -0.0202*** | -0.0202*** | -0.0203*** | -0.0203*** | -0.0204*** | -0.0203*** |
|  | (0.00370) | (0.00510) | (0.00509) | (0.00368) | (0.00511) | (0.00511) | (0.00512) | (0.00511) | (0.00511) | (0.00510) | (0.00510) |
|  |  |  |  |  |  |  |  |  |  |  |  |
| Religious Attendance | 0.000180 | 0.0142† | 0.0145† | -0.0000879 | 0.0142† | 0.0146† | 0.0144† | 0.0141† | 0.0142† | 0.0141† | 0.0144† |
|  | (0.00571) | (0.00742) | (0.00744) | (0.00570) | (0.00740) | (0.00742) | (0.00740) | (0.00738) | (0.00740) | (0.00742) | (0.00743) |
|  |  |  |  |  |  |  |  |  |  |  |  |
| Cocaine | -0.00611 | 0.0448 | 0.0427 | 0.00201 | 0.0437 | 0.0432 | 0.0426 | 0.0437 | 0.0436 | 0.0444 | 0.0425 |
|  | (0.0298) | (0.0373) | (0.0371) | (0.0304) | (0.0373) | (0.0373) | (0.0372) | (0.0373) | (0.0373) | (0.0374) | (0.0372) |
|  |  |  |  |  |  |  |  |  |  |  |  |
| Stimulants | 0.289*** | 0.147*** | 0.146*** | 0.291*** | 0.146*** | 0.146*** | 0.146*** | 0.146*** | 0.146*** | 0.146*** | 0.146*** |
|  | (0.0273) | (0.0348) | (0.0348) | (0.0274) | (0.0350) | (0.0348) | (0.0349) | (0.0350) | (0.0349) | (0.0350) | (0.0349) |
|  |  |  |  |  |  |  |  |  |  |  |  |
| Sedatives | 0.340*** | 0.0969* | 0.0968* | 0.345*** | 0.0959* | 0.0972* | 0.0961* | 0.0956* | 0.0958* | 0.0963* | 0.0956* |
|  | (0.0329) | (0.0377) | (0.0376) | (0.0328) | (0.0379) | (0.0377) | (0.0378) | (0.0378) | (0.0378) | (0.0379) | (0.0378) |
|  |  |  |  |  |  |  |  |  |  |  |  |
| Tranquilizers | 0.585*** | 0.232*** | 0.232*** | 0.585*** | 0.234*** | 0.234*** | 0.233*** | 0.234*** | 0.233*** | 0.234*** | 0.233*** |
|  | (0.0259) | (0.0333) | (0.0332) | (0.0257) | (0.0332) | (0.0331) | (0.0331) | (0.0331) | (0.0332) | (0.0332) | (0.0331) |
|  |  |  |  |  |  |  |  |  |  |  |  |
| Heroine | 0.0577 | -0.104 | -0.0970 | 0.0749 | -0.100 | -0.0882 | -0.0957 | -0.101 | -0.100 | -0.102 | -0.0951 |
|  | (0.0508) | (0.0661) | (0.0657) | (0.0514) | (0.0669) | (0.0665) | (0.0667) | (0.0670) | (0.0669) | (0.0676) | (0.0667) |
|  |  |  |  |  |  |  |  |  |  |  |  |
| Pain Killers | 0.309*** | 0.168*** | 0.168*** | 0.310*** | 0.169*** | 0.168*** | 0.169*** | 0.169*** | 0.169*** | 0.169*** | 0.169*** |
|  | (0.0258) | (0.0328) | (0.0328) | (0.0258) | (0.0327) | (0.0327) | (0.0327) | (0.0327) | (0.0327) | (0.0328) | (0.0327) |
|  |  |  |  |  |  |  |  |  |  |  |  |
| Marijuana | 0.358*** | 0.161*** | 0.159*** | 0.357*** | 0.160*** | 0.159*** | 0.160*** | 0.160*** | 0.160*** | 0.161*** | 0.159*** |
|  | (0.0244) | (0.0338) | (0.0339) | (0.0243) | (0.0335) | (0.0337) | (0.0336) | (0.0335) | (0.0335) | (0.0335) | (0.0336) |
|  |  |  |  |  |  |  |  |  |  |  |  |
| PCP | 0.106† | 0.135† | 0.135† | 0.142* | 0.139† | 0.141† | 0.140† | 0.139† | 0.139† | 0.139† | 0.140† |
|  | (0.0554) | (0.0708) | (0.0701) | (0.0582) | (0.0752) | (0.0743) | (0.0747) | (0.0752) | (0.0752) | (0.0756) | (0.0745) |
|  |  |  |  |  |  |  |  |  |  |  |  |
| Inhalants | 0.356*** | 0.205*** | 0.205*** | 0.365*** | 0.206*** | 0.204*** | 0.206*** | 0.206*** | 0.206*** | 0.206*** | 0.205*** |
|  | (0.0287) | (0.0376) | (0.0375) | (0.0283) | (0.0372) | (0.0371) | (0.0371) | (0.0373) | (0.0372) | (0.0373) | (0.0372) |
|  |  |  |  |  |  |  |  |  |  |  |  |
| Tobacco | 0.0847*** | 0.0120 | 0.0115 | 0.0832*** | 0.0118 | 0.0111 | 0.0115 | 0.0119 | 0.0118 | 0.0121 | 0.0113 |
|  | (0.0227) | (0.0264) | (0.0265) | (0.0228) | (0.0264) | (0.0264) | (0.0264) | (0.0264) | (0.0264) | (0.0264) | (0.0264) |
|  |  |  |  |  |  |  |  |  |  |  |  |
| Age of 1st Alcohol Use | -0.0850*** | -0.0367* | -0.0371* | -0.0850*** | -0.0366* | -0.0368* | -0.0368* | -0.0365* | -0.0366* | -0.0365* | -0.0368* |
|  | (0.0139) | (0.0167) | (0.0167) | (0.0139) | (0.0168) | (0.0168) | (0.0168) | (0.0168) | (0.0168) | (0.0168) | (0.0168) |
|  |  |  |  |  |  |  |  |  |  |  |  |
| Risk Behaviors | 0.251*** | 0.0993*** | 0.0996*** | 0.252*** | 0.0991*** | 0.0998*** | 0.0992*** | 0.0991*** | 0.0991*** | 0.0990*** | 0.0993*** |
|  | (0.0130) | (0.0159) | (0.0159) | (0.0129) | (0.0158) | (0.0158) | (0.0158) | (0.0158) | (0.0158) | (0.0158) | (0.0158) |
|  |  |  |  |  |  |  |  |  |  |  |  |
| d2009 | 0.126* | 0.0924 | 0.0928 | 0.126* | 0.0928 | 0.0914 | 0.0928 | 0.0928 | 0.0930 | 0.0926 | 0.0926 |
|  | (0.0518) | (0.0645) | (0.0644) | (0.0519) | (0.0642) | (0.0642) | (0.0642) | (0.0642) | (0.0642) | (0.0643) | (0.0642) |
|  |  |  |  |  |  |  |  |  |  |  |  |
| 2010 | 0.0132 | 0.00557 | 0.00572 | 0.0146 | 0.00672 | 0.00506 | 0.00668 | 0.00695 | 0.00694 | 0.00668 | 0.00660 |
|  | (0.0479) | (0.0625) | (0.0624) | (0.0480) | (0.0624) | (0.0625) | (0.0623) | (0.0623) | (0.0624) | (0.0624) | (0.0624) |
|  |  |  |  |  |  |  |  |  |  |  |  |
| 2011 | 0.00285 | -0.00238 | -0.00175 | 0.00429 | -0.00113 | -0.000780 | -0.000700 | -0.00136 | -0.000890 | -0.000955 | -0.00120 |
|  | (0.0472) | (0.0622) | (0.0621) | (0.0470) | (0.0621) | (0.0619) | (0.0620) | (0.0621) | (0.0619) | (0.0621) | (0.0620) |
|  |  |  |  |  |  |  |  |  |  |  |  |
| 2012 | 0.0230 | -0.0451 | -0.0448 | 0.0248 | -0.0422 | -0.0432 | -0.0423 | -0.0423 | -0.0418 | -0.0423 | -0.0420 |
|  | (0.0579) | (0.0761) | (0.0761) | (0.0579) | (0.0761) | (0.0761) | (0.0761) | (0.0762) | (0.0761) | (0.0761) | (0.0762) |
|  |  |  |  |  |  |  |  |  |  |  |  |
| 2013 | -0.000882 | -0.0514 | -0.0513 | 0.000318 | -0.0494 | -0.0495 | -0.0495 | -0.0493 | -0.0491 | -0.0491 | -0.0499 |
|  | (0.0526) | (0.0651) | (0.0650) | (0.0527) | (0.0653) | (0.0652) | (0.0652) | (0.0653) | (0.0653) | (0.0654) | (0.0653) |
|  |  |  |  |  |  |  |  |  |  |  |  |
| 2014 | 0.0809† | 0.0730 | 0.0732 | 0.0839† | 0.0782 | 0.0772 | 0.0781 | 0.0782 | 0.0789 | 0.0787 | 0.0778 |
|  | (0.0476) | (0.0668) | (0.0667) | (0.0474) | (0.0667) | (0.0667) | (0.0666) | (0.0667) | (0.0665) | (0.0667) | (0.0667) |
|  |  |  |  |  |  |  |  |  |  |  |  |
| 2015 | -0.346*** | -0.236*** | -0.235*** | -0.349*** | -0.237*** | -0.238*** | -0.237*** | -0.237*** | -0.237*** | -0.238*** | -0.237*** |
|  | (0.0500) | (0.0671) | (0.0671) | (0.0500) | (0.0671) | (0.0672) | (0.0671) | (0.0671) | (0.0671) | (0.0672) | (0.0671) |
|  |  |  |  |  |  |  |  |  |  |  |  |
| 2016 | -0.295*** | -0.164* | -0.164* | -0.299*** | -0.166* | -0.166* | -0.165* | -0.166* | -0.165* | -0.166* | -0.165* |
|  | (0.0472) | (0.0675) | (0.0674) | (0.0472) | (0.0676) | (0.0675) | (0.0675) | (0.0676) | (0.0675) | (0.0676) | (0.0675) |
|  |  |  |  |  |  |  |  |  |  |  |  |
| 2017 | -0.132** | -0.0312 | -0.0305 | -0.136** | -0.0323 | -0.0323 | -0.0320 | -0.0323 | -0.0320 | -0.0323 | -0.0322 |
|  | (0.0494) | (0.0674) | (0.0674) | (0.0496) | (0.0675) | (0.0676) | (0.0675) | (0.0675) | (0.0675) | (0.0676) | (0.0675) |
|  |  |  |  |  |  |  |  |  |  |  |  |
| 2018 | -0.0635 | -0.0286 | -0.0277 | -0.0673 | -0.0302 | -0.0303 | -0.0297 | -0.0301 | -0.0299 | -0.0301 | -0.0299 |
|  | (0.0424) | (0.0638) | (0.0637) | (0.0424) | (0.0637) | (0.0637) | (0.0636) | (0.0637) | (0.0636) | (0.0637) | (0.0636) |
|  |  |  |  |  |  |  |  |  |  |  |  |
| 2019 | 0.128** | 0.152* | 0.152* | 0.124** | 0.151* | 0.151* | 0.151* | 0.151* | 0.151* | 0.151* | 0.151* |
|  | (0.0438) | (0.0602) | (0.0601) | (0.0438) | (0.0601) | (0.0600) | (0.0600) | (0.0601) | (0.0601) | (0.0602) | (0.0600) |
|  |  |  |  |  |  |  |  |  |  |  |  |
| MDMA | 0.00623 | 0.0204 | 0.0247 | 0.00999 | 0.0230 | 0.257** | 0.0249 | 0.0229 | 0.0229 | 0.0216 | 0.0259 |
|  | (0.0331) | (0.0395) | (0.0393) | (0.0332) | (0.0389) | (0.0854) | (0.0389) | (0.0389) | (0.0389) | (0.0393) | (0.0388) |
|  |  |  |  |  |  |  |  |  |  |  |  |
| LCPU | -0.0545† | -0.00167 | 0.123* |  |  |  |  |  |  |  |  |
|  | (0.0320) | (0.0366) | (0.0321) |  |  |  |  |  |  |  |  |
|  |  |  |  |  |  |  |  |  |  |  |  |
| Psychological Distress Level |  | 0.161*** | 0.163*** |  | 0.161*** | 0.163*** | 0.162*** | 0.161*** | 0.161*** | 0.161*** | 0.162*** |
|  |  | (0.00219) | (0.00238) |  | (0.00219) | (0.00242) | (0.00243) | (0.00221) | (0.00219) | (0.00224) | (0.00230) |
|  |  |  |  |  |  |  |  |  |  |  |  |
| LCPU * Distress |  |  | -0.00877* |  |  |  |  |  |  |  |  |
|  |  |  | (0.00251) |  |  |  |  |  |  |  |  |
|  |  |  |  |  |  |  |  |  |  |  |  |
| Psilocybin |  |  |  | -0.0507 | 0.0350 | 0.0336 | 0.119 | 0.0348 | 0.0349 | 0.0343 | 0.0352 |
|  |  |  |  | (0.0326) | (0.0421) | (0.0418) | (0.0807) | (0.0421) | (0.0421) | (0.0421) | (0.0419) |
|  |  |  |  |  |  |  |  |  |  |  |  |
| DMT |  |  |  | -0.343† | -0.490† | -0.473† | -0.482† | -1.153 | -0.487† | -0.490† | -0.481† |
|  |  |  |  | (0.202) | (0.263) | (0.262) | (0.262) | (0.730) | (0.263) | (0.264) | (0.262) |
|  |  |  |  |  |  |  |  |  |  |  |  |
| Ayahuasca |  |  |  | -1.072* | -1.182† | -1.179† | -1.172 | -1.187† | 1.703 | -1.199† | -1.168 |
|  |  |  |  | (0.517) | (0.712) | (0.701) | (0.709) | (0.712) | (1.202) | (0.714) | (0.710) |
|  |  |  |  |  |  |  |  |  |  |  |  |
| Peyote/Mescaline |  |  |  | -0.118* | 0.00733 | 0.00652 | 0.00602 | 0.00829 | 0.00775 | -0.0866 | 0.00361 |
|  |  |  |  | (0.0470) | (0.0633) | (0.0628) | (0.0631) | (0.0635) | (0.0633) | (0.148) | (0.0628) |
|  |  |  |  |  |  |  |  |  |  |  |  |
| LSD |  |  |  | -0.0126 | -0.0315 | -0.0307 | -0.0312 | -0.0319 | -0.0315 | -0.0309 | 0.0756 |
|  |  |  |  | (0.0372) | (0.0433) | (0.0430) | (0.0432) | (0.0434) | (0.0433) | (0.0433) | (0.0814) |
|  |  |  |  |  |  |  |  |  |  |  |  |
| MDMA * Distress |  |  |  |  |  | -0.0159** |  |  |  |  |  |
|  |  |  |  |  |  | (0.00542) |  |  |  |  |  |
|  |  |  |  |  |  |  |  |  |  |  |  |
| Psilocybin * Distress |  |  |  |  |  |  | -0.00594 |  |  |  |  |
|  |  |  |  |  |  |  | (0.00498) |  |  |  |  |
|  |  |  |  |  |  |  |  |  |  |  |  |
| DMT * Distress |  |  |  |  |  |  |  | 0.0406 |  |  |  |
|  |  |  |  |  |  |  |  | (0.0445) |  |  |  |
|  |  |  |  |  |  |  |  |  |  |  |  |
| Ayahuasca * Distress |  |  |  |  |  |  |  |  | -0.197* |  |  |
|  |  |  |  |  |  |  |  |  | (0.0947) |  |  |
|  |  |  |  |  |  |  |  |  |  |  |  |
| Peyote/Mescaline * Distress |  |  |  |  |  |  |  |  |  | 0.00672 |  |
|  |  |  |  |  |  |  |  |  |  | (0.00933) |  |
|  |  |  |  |  |  |  |  |  |  |  |  |
| LSD * Distress |  |  |  |  |  |  |  |  |  |  | -0.00746 |
|  |  |  |  |  |  |  |  |  |  |  | (0.00513) |
|  |  |  |  |  |  |  |  |  |  |  |  |
| Constant | -1.735*** | -3.865*** | -3.895*** | -1.744*** | -3.864*** | -3.902*** | -3.880*** | -3.863*** | -3.866*** | -3.858*** | -3.884*** |
|  | (0.101) | (0.135) | (0.134) | (0.101) | (0.134) | (0.134) | (0.134) | (0.134) | (0.134) | (0.134) | (0.135) |
| Observations | 444228 | 148789 | 148789 | 444228 | 148789 | 148789 | 148789 | 148789 | 148789 | 148789 | 148789 |
| *R*2 |  |  |  |  |  |  |  |  |  |  |  |
| Source: 2008-2019 National Survey of Drug Use and Health, n=*458,372*  Standard errors in parentheses  a Men serve as the references category  b Single Serves as the reference category for marital statuses  c White, Non-Hispanic Serves as the reference category for race/ethnicity  d 2008 serves as the reference category for the year survey was taken  † *p* < 0.1, * *p* < 0.05, ** *p* < 0.01, *** *p* < 0.001 | | | | | | | | | | | |

| Table 4. Weighted Multivariate Logistic Regression Predicting Missing Needed Mental Health Treatment Among Men | | | | | | | | | | | |
| --- | --- | --- | --- | --- | --- | --- | --- | --- | --- | --- | --- |
|  | Model 1 | Model 2 | Model 3 | Model 4 | Model 5 | Model 6 | Model 7 | Model 8 | Model 9 | Model 10 | Model 11 |
| Age | -0.1000*** | -0.0254* | -0.0252* | -0.0988*** | -0.0244* | -0.0244* | -0.0242* | -0.0245* | -0.0244* | -0.0245* | -0.0243* |
|  | (0.00795) | (0.0118) | (0.0119) | (0.00795) | (0.0116) | (0.0116) | (0.0116) | (0.0116) | (0.0116) | (0.0117) | (0.0117) |
|  |  |  |  |  |  |  |  |  |  |  |  |
| Education | 0.0995*** | 0.153*** | 0.153*** | 0.100*** | 0.152*** | 0.153*** | 0.152*** | 0.152*** | 0.152*** | 0.152*** | 0.152*** |
|  | (0.0163) | (0.0229) | (0.0228) | (0.0164) | (0.0228) | (0.0229) | (0.0228) | (0.0228) | (0.0228) | (0.0228) | (0.0228) |
|  |  |  |  |  |  |  |  |  |  |  |  |
| Family Income | -0.162*** | -0.0986*** | -0.0986*** | -0.162*** | -0.0987*** | -0.0983*** | -0.0985*** | -0.0987*** | -0.0987*** | -0.0987*** | -0.0986*** |
|  | (0.00903) | (0.0108) | (0.0108) | (0.00903) | (0.0108) | (0.0108) | (0.0107) | (0.0108) | (0.0108) | (0.0108) | (0.0107) |
|  |  |  |  |  |  |  |  |  |  |  |  |
| bMarried | -0.359*** | -0.0744 | -0.0731 | -0.358*** | -0.0728 | -0.0718 | -0.0725 | -0.0730 | -0.0728 | -0.0731 | -0.0714 |
|  | (0.0523) | (0.0629) | (0.0629) | (0.0524) | (0.0632) | (0.0631) | (0.0632) | (0.0632) | (0.0632) | (0.0631) | (0.0632) |
|  |  |  |  |  |  |  |  |  |  |  |  |
| Divorced | -0.360* | -0.359† | -0.357† | -0.358* | -0.355† | -0.355† | -0.354† | -0.355† | -0.355† | -0.356† | -0.353† |
|  | (0.142) | (0.185) | (0.185) | (0.142) | (0.186) | (0.186) | (0.186) | (0.186) | (0.186) | (0.185) | (0.185) |
|  |  |  |  |  |  |  |  |  |  |  |  |
| Widowed | 0.156** | 0.185** | 0.186** | 0.159** | 0.190** | 0.191** | 0.190** | 0.191** | 0.190** | 0.190** | 0.191** |
|  | (0.0586) | (0.0683) | (0.0681) | (0.0587) | (0.0693) | (0.0692) | (0.0692) | (0.0692) | (0.0693) | (0.0692) | (0.0691) |
|  |  |  |  |  |  |  |  |  |  |  |  |
| cBlack | -0.0962† | 0.0453 | 0.0439 | -0.0940† | 0.0504 | 0.0490 | 0.0508 | 0.0505 | 0.0504 | 0.0506 | 0.0501 |
|  | (0.0523) | (0.0673) | (0.0674) | (0.0524) | (0.0682) | (0.0683) | (0.0684) | (0.0682) | (0.0682) | (0.0682) | (0.0682) |
|  |  |  |  |  |  |  |  |  |  |  |  |
| Hispanic | -0.0949 | -0.1000 | -0.101 | -0.0937 | -0.0971 | -0.0974 | -0.0981 | -0.0971 | -0.0971 | -0.0967 | -0.0978 |
|  | (0.0595) | (0.0742) | (0.0740) | (0.0598) | (0.0751) | (0.0748) | (0.0750) | (0.0752) | (0.0751) | (0.0751) | (0.0749) |
|  |  |  |  |  |  |  |  |  |  |  |  |
| Asian | -0.188 | -0.194 | -0.190 | -0.188 | -0.192 | -0.188 | -0.189 | -0.193 | -0.192 | -0.192 | -0.190 |
|  | (0.118) | (0.152) | (0.153) | (0.118) | (0.153) | (0.153) | (0.153) | (0.153) | (0.153) | (0.152) | (0.153) |
|  |  |  |  |  |  |  |  |  |  |  |  |
| Native American | 0.123 | -0.0255 | -0.0265 | 0.130 | -0.0256 | -0.0173 | -0.0236 | -0.0250 | -0.0256 | -0.0270 | -0.0293 |
|  | (0.180) | (0.243) | (0.240) | (0.181) | (0.243) | (0.241) | (0.241) | (0.243) | (0.243) | (0.244) | (0.243) |
|  |  |  |  |  |  |  |  |  |  |  |  |
| Hawaiian/Pacific I | -1.242*** | -1.259** | -1.264** | -1.239*** | -1.255** | -1.252** | -1.257** | -1.255** | -1.255** | -1.254** | -1.259** |
|  | (0.331) | (0.443) | (0.443) | (0.331) | (0.443) | (0.443) | (0.443) | (0.443) | (0.443) | (0.443) | (0.443) |
|  |  |  |  |  |  |  |  |  |  |  |  |
| Multi Racial | 0.280** | 0.133 | 0.133 | 0.283** | 0.135 | 0.136 | 0.135 | 0.134 | 0.135 | 0.134 | 0.135 |
|  | (0.0983) | (0.117) | (0.117) | (0.0982) | (0.116) | (0.116) | (0.116) | (0.116) | (0.116) | (0.116) | (0.116) |
|  |  |  |  |  |  |  |  |  |  |  |  |
| Religious Salience | -0.0533*** | -0.0383*** | -0.0379*** | -0.0530*** | -0.0379*** | -0.0376*** | -0.0375*** | -0.0380*** | -0.0379*** | -0.0380*** | -0.0378*** |
|  | (0.00589) | (0.00881) | (0.00881) | (0.00588) | (0.00881) | (0.00884) | (0.00887) | (0.00881) | (0.00881) | (0.00881) | (0.00881) |
|  |  |  |  |  |  |  |  |  |  |  |  |
| Religious Attendance | 0.0330** | 0.0220 | 0.0228 | 0.0328** | 0.0222 | 0.0228 | 0.0226 | 0.0220 | 0.0222 | 0.0220 | 0.0226 |
|  | (0.0113) | (0.0164) | (0.0164) | (0.0114) | (0.0164) | (0.0163) | (0.0163) | (0.0164) | (0.0164) | (0.0164) | (0.0164) |
|  |  |  |  |  |  |  |  |  |  |  |  |
| Cocaine | 0.0327 | 0.0826 | 0.0786 | 0.0297 | 0.0739 | 0.0734 | 0.0715 | 0.0737 | 0.0738 | 0.0747 | 0.0719 |
|  | (0.0586) | (0.0716) | (0.0712) | (0.0602) | (0.0740) | (0.0742) | (0.0740) | (0.0740) | (0.0740) | (0.0740) | (0.0737) |
|  |  |  |  |  |  |  |  |  |  |  |  |
| Stimulants | 0.269*** | 0.133* | 0.133* | 0.269*** | 0.132* | 0.133* | 0.132* | 0.133* | 0.132* | 0.132* | 0.132* |
|  | (0.0459) | (0.0645) | (0.0642) | (0.0456) | (0.0644) | (0.0639) | (0.0641) | (0.0646) | (0.0644) | (0.0646) | (0.0642) |
|  |  |  |  |  |  |  |  |  |  |  |  |
| Sedatives | 0.379*** | 0.123† | 0.123† | 0.387*** | 0.126† | 0.128† | 0.127† | 0.126† | 0.126† | 0.127† | 0.125† |
|  | (0.0526) | (0.0724) | (0.0720) | (0.0523) | (0.0720) | (0.0718) | (0.0717) | (0.0720) | (0.0720) | (0.0722) | (0.0719) |
|  |  |  |  |  |  |  |  |  |  |  |  |
| Tranquilizers | 0.592*** | 0.299*** | 0.298*** | 0.590*** | 0.297*** | 0.297*** | 0.297*** | 0.297*** | 0.297*** | 0.297*** | 0.297*** |
|  | (0.0459) | (0.0588) | (0.0587) | (0.0456) | (0.0583) | (0.0583) | (0.0582) | (0.0583) | (0.0583) | (0.0583) | (0.0582) |
|  |  |  |  |  |  |  |  |  |  |  |  |
| Heroine | 0.163* | -0.0458 | -0.0340 | 0.180** | -0.0336 | -0.0244 | -0.0249 | -0.0349 | -0.0336 | -0.0352 | -0.0263 |
|  | (0.0671) | (0.0888) | (0.0868) | (0.0677) | (0.0892) | (0.0881) | (0.0883) | (0.0894) | (0.0892) | (0.0893) | (0.0878) |
|  |  |  |  |  |  |  |  |  |  |  |  |
| Pain Killers | 0.254*** | 0.103† | 0.101† | 0.253*** | 0.102† | 0.0998† | 0.0999† | 0.102† | 0.102† | 0.102† | 0.101† |
|  | (0.0446) | (0.0567) | (0.0566) | (0.0445) | (0.0569) | (0.0568) | (0.0568) | (0.0569) | (0.0569) | (0.0569) | (0.0568) |
|  |  |  |  |  |  |  |  |  |  |  |  |
| Marijuana | 0.259*** | 0.0716 | 0.0675 | 0.254*** | 0.0670 | 0.0654 | 0.0647 | 0.0670 | 0.0670 | 0.0674 | 0.0649 |
|  | (0.0504) | (0.0672) | (0.0678) | (0.0503) | (0.0671) | (0.0673) | (0.0674) | (0.0671) | (0.0671) | (0.0672) | (0.0675) |
|  |  |  |  |  |  |  |  |  |  |  |  |
| PCP | -0.109 | -0.0573 | -0.0583 | -0.0720 | -0.0330 | -0.0310 | -0.0326 | -0.0322 | -0.0330 | -0.0321 | -0.0326 |
|  | (0.0772) | (0.107) | (0.106) | (0.0833) | (0.112) | (0.111) | (0.111) | (0.112) | (0.112) | (0.112) | (0.111) |
|  |  |  |  |  |  |  |  |  |  |  |  |
| Inhalants | 0.477*** | 0.326*** | 0.323*** | 0.478*** | 0.323*** | 0.321*** | 0.321*** | 0.323*** | 0.323*** | 0.323*** | 0.321*** |
|  | (0.0456) | (0.0567) | (0.0566) | (0.0455) | (0.0567) | (0.0567) | (0.0565) | (0.0567) | (0.0567) | (0.0568) | (0.0569) |
|  |  |  |  |  |  |  |  |  |  |  |  |
| Tobacco | -0.00872 | -0.0539 | -0.0531 | -0.0112 | -0.0577 | -0.0578 | -0.0578 | -0.0578 | -0.0577 | -0.0576 | -0.0574 |
|  | (0.0501) | (0.0670) | (0.0675) | (0.0501) | (0.0669) | (0.0672) | (0.0672) | (0.0669) | (0.0669) | (0.0669) | (0.0672) |
|  |  |  |  |  |  |  |  |  |  |  |  |
| Age of 1st Alcohol Use | -0.00851 | 0.0107 | 0.00988 | -0.00844 | 0.0107 | 0.0102 | 0.0101 | 0.0108 | 0.0107 | 0.0109 | 0.0103 |
|  | (0.0210) | (0.0247) | (0.0247) | (0.0210) | (0.0246) | (0.0247) | (0.0247) | (0.0246) | (0.0246) | (0.0247) | (0.0247) |
|  |  |  |  |  |  |  |  |  |  |  |  |
| Risk Behaviors | 0.246*** | 0.102*** | 0.102*** | 0.246*** | 0.101*** | 0.101*** | 0.101*** | 0.101*** | 0.101*** | 0.101*** | 0.101*** |
|  | (0.0210) | (0.0254) | (0.0253) | (0.0211) | (0.0255) | (0.0255) | (0.0255) | (0.0255) | (0.0255) | (0.0256) | (0.0255) |
|  |  |  |  |  |  |  |  |  |  |  |  |
| d2009 | 0.159† | -0.0891 | -0.0886 | 0.160† | -0.0887 | -0.0908 | -0.0891 | -0.0887 | -0.0887 | -0.0886 | -0.0892 |
|  | (0.0950) | (0.116) | (0.117) | (0.0950) | (0.115) | (0.115) | (0.115) | (0.115) | (0.115) | (0.115) | (0.115) |
|  |  |  |  |  |  |  |  |  |  |  |  |
| 2010 | -0.0479 | -0.194† | -0.192† | -0.0444 | -0.192† | -0.194† | -0.191† | -0.191† | -0.192† | -0.191† | -0.191† |
|  | (0.0964) | (0.110) | (0.111) | (0.0965) | (0.110) | (0.111) | (0.111) | (0.110) | (0.110) | (0.110) | (0.111) |
|  |  |  |  |  |  |  |  |  |  |  |  |
| 2011 | 0.0426 | -0.141 | -0.140 | 0.0442 | -0.140 | -0.140 | -0.139 | -0.140 | -0.140 | -0.140 | -0.140 |
|  | (0.0853) | (0.115) | (0.115) | (0.0856) | (0.115) | (0.115) | (0.115) | (0.115) | (0.115) | (0.115) | (0.115) |
|  |  |  |  |  |  |  |  |  |  |  |  |
| 2012 | 0.0124 | -0.267* | -0.263* | 0.0152 | -0.259* | -0.261* | -0.257* | -0.259* | -0.259* | -0.259* | -0.257* |
|  | (0.0990) | (0.124) | (0.124) | (0.0989) | (0.123) | (0.123) | (0.123) | (0.123) | (0.123) | (0.123) | (0.123) |
|  |  |  |  |  |  |  |  |  |  |  |  |
| 2013 | 0.00524 | -0.237† | -0.235† | 0.00789 | -0.232† | -0.231† | -0.232† | -0.232† | -0.232† | -0.232† | -0.231† |
|  | (0.0864) | (0.130) | (0.130) | (0.0865) | (0.130) | (0.130) | (0.130) | (0.130) | (0.130) | (0.130) | (0.130) |
|  |  |  |  |  |  |  |  |  |  |  |  |
| 2014 | 0.0966 | 0.0109 | 0.0124 | 0.101 | 0.0192 | 0.0180 | 0.0196 | 0.0193 | 0.0193 | 0.0199 | 0.0191 |
|  | (0.0869) | (0.121) | (0.121) | (0.0867) | (0.120) | (0.120) | (0.120) | (0.120) | (0.120) | (0.120) | (0.120) |
|  |  |  |  |  |  |  |  |  |  |  |  |
| 2015 | -0.243** | -0.423*** | -0.421*** | -0.244** | -0.426*** | -0.424*** | -0.424*** | -0.426*** | -0.426*** | -0.426*** | -0.425*** |
|  | (0.0837) | (0.111) | (0.111) | (0.0840) | (0.111) | (0.111) | (0.111) | (0.111) | (0.111) | (0.111) | (0.111) |
|  |  |  |  |  |  |  |  |  |  |  |  |
| 2016 | -0.156* | -0.239* | -0.235* | -0.157* | -0.240* | -0.239* | -0.238* | -0.240* | -0.240* | -0.240* | -0.238* |
|  | (0.0781) | (0.106) | (0.106) | (0.0782) | (0.107) | (0.106) | (0.107) | (0.106) | (0.107) | (0.107) | (0.106) |
|  |  |  |  |  |  |  |  |  |  |  |  |
| 2017 | -0.0418 | -0.134 | -0.131 | -0.0455 | -0.136 | -0.136 | -0.135 | -0.136 | -0.136 | -0.136 | -0.135 |
|  | (0.0792) | (0.115) | (0.116) | (0.0797) | (0.116) | (0.116) | (0.116) | (0.116) | (0.116) | (0.116) | (0.116) |
|  |  |  |  |  |  |  |  |  |  |  |  |
| 2018 | -0.0256 | -0.265* | -0.261* | -0.0290 | -0.270** | -0.269** | -0.267* | -0.269** | -0.270** | -0.270** | -0.268** |
|  | (0.0758) | (0.102) | (0.101) | (0.0760) | (0.102) | (0.102) | (0.102) | (0.102) | (0.102) | (0.102) | (0.101) |
|  |  |  |  |  |  |  |  |  |  |  |  |
| 2019 | 0.229** | -0.00729 | -0.00489 | 0.226** | -0.0116 | -0.0116 | -0.0105 | -0.0115 | -0.0116 | -0.0114 | -0.0113 |
|  | (0.0815) | (0.104) | (0.103) | (0.0818) | (0.104) | (0.104) | (0.104) | (0.104) | (0.104) | (0.104) | (0.104) |
|  |  |  |  |  |  |  |  |  |  |  |  |
| MDMA | 0.00375 | -0.000636 | 0.00915 | -0.00643 | -0.0131 | 0.241† | -0.00710 | -0.0135 | -0.0131 | -0.0148 | -0.00815 |
|  | (0.0541) | (0.0712) | (0.0707) | (0.0543) | (0.0697) | (0.132) | (0.0696) | (0.0699) | (0.0697) | (0.0707) | (0.0696) |
|  |  |  |  |  |  |  |  |  |  |  |  |
| LCPU | -0.0665 | -0.0380 | 0.188 |  |  |  |  |  |  |  |  |
|  | (0.0510) | (0.0590) | (0.121) |  |  |  |  |  |  |  |  |
|  |  |  |  |  |  |  |  |  |  |  |  |
| Psychological Distress Level |  | 0.166*** | 0.171*** |  | 0.166*** | 0.170*** | 0.169*** | 0.166*** | 0.166*** | 0.166*** | 0.169*** |
|  |  | (0.00388) | (0.00468) |  | (0.00389) | (0.00444) | (0.00471) | (0.00388) | (0.00389) | (0.00421) | (0.00434) |
|  |  |  |  |  |  |  |  |  |  |  |  |
| LCPU * Distress |  |  | -0.0159* |  |  |  |  |  |  |  |  |
|  |  |  | (0.00712) |  |  |  |  |  |  |  |  |
|  |  |  |  |  |  |  |  |  |  |  |  |
| Psilocybin |  |  |  | -0.00132 | 0.0923 | 0.0917 | 0.267† | 0.0920 | 0.0923 | 0.0914 | 0.0933 |
|  |  |  |  | (0.0584) | (0.0761) | (0.0757) | (0.138) | (0.0761) | (0.0761) | (0.0761) | (0.0760) |
|  |  |  |  |  |  |  |  |  |  |  |  |
| DMT |  |  |  | -0.185 | -0.414 | -0.396 | -0.400 | -1.140 | -0.414 | -0.414 | -0.402 |
|  |  |  |  | (0.224) | (0.292) | (0.289) | (0.289) | (0.954) | (0.292) | (0.293) | (0.290) |
|  |  |  |  |  |  |  |  |  |  |  |  |
| Ayahuasca |  |  |  | -1.068† | -0.935 | -0.954 | -0.915 | -0.956 | -0.566 | -0.951 | -0.919 |
|  |  |  |  | (0.639) | (0.717) | (0.719) | (0.710) | (0.723) | (0.956) | (0.723) | (0.711) |
|  |  |  |  |  |  |  |  |  |  |  |  |
| Peyote/Mescaline |  |  |  | -0.137* | -0.0868 | -0.0868 | -0.0885 | -0.0853 | -0.0868 | -0.166 | -0.0915 |
|  |  |  |  | (0.0683) | (0.0949) | (0.0942) | (0.0940) | (0.0949) | (0.0949) | (0.229) | (0.0941) |
|  |  |  |  |  |  |  |  |  |  |  |  |
| LSD |  |  |  | -0.0112 | -0.0620 | -0.0611 | -0.0612 | -0.0626 | -0.0620 | -0.0611 | 0.0892 |
|  |  |  |  | (0.0570) | (0.0699) | (0.0694) | (0.0694) | (0.0700) | (0.0699) | (0.0700) | (0.130) |
|  |  |  |  |  |  |  |  |  |  |  |  |
| MDMA * Distress |  |  |  |  |  | -0.0173* |  |  |  |  |  |
|  |  |  |  |  |  | (0.00812) |  |  |  |  |  |
|  |  |  |  |  |  |  |  |  |  |  |  |
| Psilocybin * Distress |  |  |  |  |  |  | -0.0123 |  |  |  |  |
|  |  |  |  |  |  |  | (0.00765) |  |  |  |  |
|  |  |  |  |  |  |  |  |  |  |  |  |
| DMT * Distress |  |  |  |  |  |  |  | 0.0445 |  |  |  |
|  |  |  |  |  |  |  |  | (0.0575) |  |  |  |
|  |  |  |  |  |  |  |  |  |  |  |  |
| Ayahuasca * Distress |  |  |  |  |  |  |  |  | -0.0203 |  |  |
|  |  |  |  |  |  |  |  |  | (0.0539) |  |  |
|  |  |  |  |  |  |  |  |  |  |  |  |
| Peyote/Mescaline * Distress |  |  |  |  |  |  |  |  |  | 0.00561 |  |
|  |  |  |  |  |  |  |  |  |  | (0.0138) |  |
|  |  |  |  |  |  |  |  |  |  |  |  |
| LSD * Distress |  |  |  |  |  |  |  |  |  |  | -0.0106 |
|  |  |  |  |  |  |  |  |  |  |  | (0.00744) |
|  |  |  |  |  |  |  |  |  |  |  |  |
| Constant | -2.120*** | -3.993*** | -4.069*** | -2.139*** | -4.007*** | -4.055*** | -4.056*** | -4.003*** | -4.007*** | -3.998*** | -4.047*** |
|  | (0.153) | (0.227) | (0.233) | (0.152) | (0.225) | (0.231) | (0.231) | (0.225) | (0.225) | (0.228) | (0.229) |
| Observations | 205953 | 54977 | 54977 | 205953 | 54977 | 54977 | 54977 | 54977 | 54977 | 54977 | 54977 |
| *R*2 |  |  |  |  |  |  |  |  |  |  |  |
| Source: 2008-2019 National Survey of Drug Use and Health, n=*458,372*  Standard errors in parentheses  a Men serve as the references category  b Single Serves as the reference category for marital statuses  c White, Non-Hispanic Serves as the reference category for race/ethnicity  d 2008 serves as the reference category for the year survey was taken  † *p* < 0.1, * *p* < 0.05, ** *p* < 0.01, *** *p* < 0.001 | | | | | | | | | | | |

| Table 5. Weighted Multivariate Logistic Regression Predicting Missing Needed Mental Health Treatment Among Women | | | | | | | | | | | |
| --- | --- | --- | --- | --- | --- | --- | --- | --- | --- | --- | --- |
|  | Model 1 | Model 2 | Model 3 | Model 4 | Model 5 | Model 6 | Model 7 | Model 8 | Model 9 | Model 10 | Model 11 |
| Age | -0.170*** | -0.0770*** | -0.0768*** | -0.169*** | -0.0774*** | -0.0769*** | -0.0773*** | -0.0774*** | -0.0773*** | -0.0774*** | -0.0772*** |
|  | (0.00534) | (0.00749) | (0.00749) | (0.00529) | (0.00743) | (0.00745) | (0.00743) | (0.00742) | (0.00743) | (0.00743) | (0.00745) |
|  |  |  |  |  |  |  |  |  |  |  |  |
| Education | 0.153*** | 0.198*** | 0.198*** | 0.154*** | 0.198*** | 0.197*** | 0.198*** | 0.198*** | 0.198*** | 0.198*** | 0.197*** |
|  | (0.0135) | (0.0192) | (0.0191) | (0.0136) | (0.0194) | (0.0194) | (0.0194) | (0.0194) | (0.0194) | (0.0194) | (0.0194) |
|  |  |  |  |  |  |  |  |  |  |  |  |
| Family Income | -0.113*** | -0.0499*** | -0.0499*** | -0.114*** | -0.0498*** | -0.0494*** | -0.0498*** | -0.0498*** | -0.0497*** | -0.0498*** | -0.0498*** |
|  | (0.00662) | (0.00883) | (0.00882) | (0.00659) | (0.00881) | (0.00881) | (0.00881) | (0.00881) | (0.00879) | (0.00881) | (0.00882) |
|  |  |  |  |  |  |  |  |  |  |  |  |
| bMarried | -0.133*** | -0.0685 | -0.0687 | -0.134*** | -0.0683 | -0.0692 | -0.0685 | -0.0683 | -0.0685 | -0.0682 | -0.0684 |
|  | (0.0327) | (0.0424) | (0.0423) | (0.0328) | (0.0425) | (0.0424) | (0.0425) | (0.0425) | (0.0425) | (0.0425) | (0.0424) |
|  |  |  |  |  |  |  |  |  |  |  |  |
| Divorced | -0.369*** | -0.189† | -0.189† | -0.370*** | -0.188† | -0.188† | -0.188† | -0.188† | -0.188† | -0.188† | -0.188† |
|  | (0.0794) | (0.105) | (0.105) | (0.0793) | (0.105) | (0.105) | (0.105) | (0.105) | (0.105) | (0.105) | (0.105) |
|  |  |  |  |  |  |  |  |  |  |  |  |
| Widowed | 0.194*** | 0.0453 | 0.0446 | 0.193*** | 0.0448 | 0.0425 | 0.0445 | 0.0449 | 0.0448 | 0.0450 | 0.0441 |
|  | (0.0387) | (0.0477) | (0.0476) | (0.0390) | (0.0478) | (0.0476) | (0.0478) | (0.0477) | (0.0478) | (0.0478) | (0.0477) |
|  |  |  |  |  |  |  |  |  |  |  |  |
| cBlack | -0.0784† | 0.121* | 0.121* | -0.0813† | 0.119* | 0.120* | 0.119* | 0.119* | 0.120* | 0.119* | 0.119* |
|  | (0.0431) | (0.0559) | (0.0559) | (0.0430) | (0.0556) | (0.0557) | (0.0557) | (0.0557) | (0.0557) | (0.0556) | (0.0557) |
|  |  |  |  |  |  |  |  |  |  |  |  |
| Hispanic | -0.130*** | -0.0742† | -0.0746† | -0.132*** | -0.0758† | -0.0762† | -0.0759† | -0.0758† | -0.0756† | -0.0759† | -0.0764† |
|  | (0.0370) | (0.0426) | (0.0426) | (0.0370) | (0.0426) | (0.0425) | (0.0426) | (0.0426) | (0.0426) | (0.0425) | (0.0425) |
|  |  |  |  |  |  |  |  |  |  |  |  |
| Asian | -0.347*** | -0.257* | -0.256* | -0.348*** | -0.258* | -0.259* | -0.258* | -0.258* | -0.258* | -0.258* | -0.258* |
|  | (0.0758) | (0.0992) | (0.0993) | (0.0757) | (0.0994) | (0.0996) | (0.0995) | (0.0994) | (0.0994) | (0.0994) | (0.0995) |
|  |  |  |  |  |  |  |  |  |  |  |  |
| Native American | 0.0202 | -0.0112 | -0.0102 | 0.0262 | -0.0186 | -0.0153 | -0.0174 | -0.0188 | -0.0188 | -0.0191 | -0.0179 |
|  | (0.133) | (0.149) | (0.148) | (0.133) | (0.149) | (0.149) | (0.149) | (0.149) | (0.149) | (0.150) | (0.149) |
|  |  |  |  |  |  |  |  |  |  |  |  |
| Hawaiian/Pacific I | -0.725** | -1.088*** | -1.088*** | -0.729** | -1.088*** | -1.083*** | -1.088*** | -1.088*** | -1.088*** | -1.088*** | -1.088*** |
|  | (0.246) | (0.284) | (0.284) | (0.246) | (0.285) | (0.283) | (0.285) | (0.285) | (0.285) | (0.284) | (0.284) |
|  |  |  |  |  |  |  |  |  |  |  |  |
| Multi Racial | 0.226** | 0.192* | 0.191* | 0.227** | 0.189* | 0.189* | 0.189* | 0.189* | 0.190* | 0.190* | 0.189* |
|  | (0.0686) | (0.0827) | (0.0826) | (0.0686) | (0.0826) | (0.0824) | (0.0826) | (0.0826) | (0.0826) | (0.0828) | (0.0824) |
|  |  |  |  |  |  |  |  |  |  |  |  |
| Religious Salience | -0.0176*** | -0.0114† | -0.0113† | -0.0179*** | -0.0116† | -0.0115† | -0.0116† | -0.0116† | -0.0117† | -0.0117† | -0.0116† |
|  | (0.00479) | (0.00619) | (0.00619) | (0.00477) | (0.00618) | (0.00617) | (0.00618) | (0.00618) | (0.00618) | (0.00617) | (0.00618) |
|  |  |  |  |  |  |  |  |  |  |  |  |
| Religious Attendance | -0.0107 | 0.0125 | 0.0127 | -0.0110 | 0.0124 | 0.0127 | 0.0125 | 0.0124 | 0.0125 | 0.0124 | 0.0125 |
|  | (0.00682) | (0.00894) | (0.00895) | (0.00683) | (0.00894) | (0.00894) | (0.00894) | (0.00894) | (0.00894) | (0.00894) | (0.00894) |
|  |  |  |  |  |  |  |  |  |  |  |  |
| Cocaine | -0.0314 | 0.0194 | 0.0182 | -0.0169 | 0.0217 | 0.0212 | 0.0211 | 0.0218 | 0.0222 | 0.0220 | 0.0207 |
|  | (0.0421) | (0.0547) | (0.0544) | (0.0420) | (0.0543) | (0.0541) | (0.0542) | (0.0543) | (0.0543) | (0.0543) | (0.0543) |
|  |  |  |  |  |  |  |  |  |  |  |  |
| Stimulants | 0.299*** | 0.160*** | 0.159*** | 0.302*** | 0.159*** | 0.158*** | 0.159*** | 0.159*** | 0.159*** | 0.160*** | 0.159*** |
|  | (0.0307) | (0.0378) | (0.0378) | (0.0308) | (0.0379) | (0.0378) | (0.0379) | (0.0379) | (0.0379) | (0.0378) | (0.0378) |
|  |  |  |  |  |  |  |  |  |  |  |  |
| Sedatives | 0.321*** | 0.0847† | 0.0849† | 0.325*** | 0.0829† | 0.0845† | 0.0831† | 0.0828† | 0.0825† | 0.0830† | 0.0831† |
|  | (0.0390) | (0.0468) | (0.0467) | (0.0391) | (0.0467) | (0.0465) | (0.0467) | (0.0467) | (0.0467) | (0.0467) | (0.0466) |
|  |  |  |  |  |  |  |  |  |  |  |  |
| Tranquilizers | 0.585*** | 0.207*** | 0.207*** | 0.586*** | 0.208*** | 0.209*** | 0.208*** | 0.208*** | 0.208*** | 0.208*** | 0.208*** |
|  | (0.0307) | (0.0399) | (0.0399) | (0.0307) | (0.0399) | (0.0398) | (0.0399) | (0.0399) | (0.0399) | (0.0400) | (0.0399) |
|  |  |  |  |  |  |  |  |  |  |  |  |
| Heroine | -0.0616 | -0.173† | -0.168† | -0.0469 | -0.176† | -0.160 | -0.174† | -0.176† | -0.177† | -0.177† | -0.172† |
|  | (0.0749) | (0.0989) | (0.0995) | (0.0748) | (0.0986) | (0.0992) | (0.0987) | (0.0986) | (0.0986) | (0.0997) | (0.0990) |
|  |  |  |  |  |  |  |  |  |  |  |  |
| Pain Killers | 0.352*** | 0.198*** | 0.198*** | 0.354*** | 0.198*** | 0.198*** | 0.198*** | 0.198*** | 0.199*** | 0.198*** | 0.198*** |
|  | (0.0297) | (0.0384) | (0.0383) | (0.0297) | (0.0383) | (0.0383) | (0.0383) | (0.0383) | (0.0383) | (0.0383) | (0.0383) |
|  |  |  |  |  |  |  |  |  |  |  |  |
| Marijuana | 0.387*** | 0.191*** | 0.190*** | 0.387*** | 0.192*** | 0.191*** | 0.191*** | 0.192*** | 0.192*** | 0.192*** | 0.191*** |
|  | (0.0321) | (0.0391) | (0.0391) | (0.0321) | (0.0390) | (0.0391) | (0.0390) | (0.0390) | (0.0390) | (0.0390) | (0.0390) |
|  |  |  |  |  |  |  |  |  |  |  |  |
| PCP | 0.272** | 0.266* | 0.267* | 0.309*** | 0.260* | 0.263* | 0.261* | 0.260* | 0.260* | 0.260* | 0.261* |
|  | (0.0840) | (0.104) | (0.104) | (0.0862) | (0.107) | (0.106) | (0.107) | (0.107) | (0.107) | (0.107) | (0.106) |
|  |  |  |  |  |  |  |  |  |  |  |  |
| Inhalants | 0.274*** | 0.116* | 0.116* | 0.286*** | 0.118* | 0.116* | 0.118* | 0.118* | 0.118* | 0.118* | 0.118* |
|  | (0.0391) | (0.0523) | (0.0521) | (0.0396) | (0.0528) | (0.0524) | (0.0527) | (0.0528) | (0.0528) | (0.0528) | (0.0526) |
|  |  |  |  |  |  |  |  |  |  |  |  |
| Tobacco | 0.122*** | 0.0442 | 0.0438 | 0.122*** | 0.0447 | 0.0438 | 0.0446 | 0.0448 | 0.0447 | 0.0449 | 0.0442 |
|  | (0.0290) | (0.0345) | (0.0345) | (0.0290) | (0.0345) | (0.0345) | (0.0345) | (0.0345) | (0.0345) | (0.0345) | (0.0345) |
|  |  |  |  |  |  |  |  |  |  |  |  |
| Age of 1st Alcohol Use | -0.111*** | -0.0517* | -0.0519* | -0.111*** | -0.0516* | -0.0518* | -0.0517* | -0.0516* | -0.0515* | -0.0516* | -0.0518* |
|  | (0.0171) | (0.0213) | (0.0212) | (0.0171) | (0.0213) | (0.0213) | (0.0213) | (0.0213) | (0.0213) | (0.0213) | (0.0213) |
|  |  |  |  |  |  |  |  |  |  |  |  |
| Risk Behaviors | 0.266*** | 0.104*** | 0.104*** | 0.267*** | 0.104*** | 0.105*** | 0.104*** | 0.104*** | 0.104*** | 0.104*** | 0.104*** |
|  | (0.0153) | (0.0199) | (0.0199) | (0.0152) | (0.0198) | (0.0198) | (0.0198) | (0.0198) | (0.0198) | (0.0198) | (0.0198) |
|  |  |  |  |  |  |  |  |  |  |  |  |
| d2009 | 0.107† | 0.174* | 0.174* | 0.107† | 0.174* | 0.173* | 0.174* | 0.174* | 0.174* | 0.174* | 0.174* |
|  | (0.0588) | (0.0830) | (0.0830) | (0.0591) | (0.0831) | (0.0830) | (0.0831) | (0.0831) | (0.0831) | (0.0831) | (0.0830) |
|  |  |  |  |  |  |  |  |  |  |  |  |
| 2010 | 0.0475 | 0.0965 | 0.0963 | 0.0469 | 0.0960 | 0.0947 | 0.0960 | 0.0960 | 0.0959 | 0.0958 | 0.0958 |
|  | (0.0576) | (0.0766) | (0.0766) | (0.0575) | (0.0764) | (0.0765) | (0.0764) | (0.0764) | (0.0764) | (0.0763) | (0.0764) |
|  |  |  |  |  |  |  |  |  |  |  |  |
| 2011 | -0.0174 | 0.0583 | 0.0588 | -0.0168 | 0.0590 | 0.0596 | 0.0593 | 0.0589 | 0.0589 | 0.0592 | 0.0589 |
|  | (0.0677) | (0.0770) | (0.0769) | (0.0673) | (0.0769) | (0.0766) | (0.0769) | (0.0770) | (0.0770) | (0.0771) | (0.0769) |
|  |  |  |  |  |  |  |  |  |  |  |  |
| 2012 | 0.0254 | 0.0605 | 0.0600 | 0.0265 | 0.0613 | 0.0605 | 0.0609 | 0.0614 | 0.0613 | 0.0615 | 0.0609 |
|  | (0.0664) | (0.0847) | (0.0846) | (0.0664) | (0.0848) | (0.0847) | (0.0847) | (0.0847) | (0.0848) | (0.0848) | (0.0847) |
|  |  |  |  |  |  |  |  |  |  |  |  |
| 2013 | -0.00712 | 0.0338 | 0.0334 | -0.00760 | 0.0344 | 0.0335 | 0.0342 | 0.0345 | 0.0334 | 0.0346 | 0.0333 |
|  | (0.0678) | (0.0740) | (0.0739) | (0.0679) | (0.0740) | (0.0739) | (0.0739) | (0.0739) | (0.0741) | (0.0740) | (0.0739) |
|  |  |  |  |  |  |  |  |  |  |  |  |
| 2014 | 0.0714 | 0.108 | 0.108 | 0.0728 | 0.111 | 0.110 | 0.111 | 0.111 | 0.112 | 0.111 | 0.111 |
|  | (0.0543) | (0.0709) | (0.0708) | (0.0544) | (0.0711) | (0.0711) | (0.0710) | (0.0711) | (0.0711) | (0.0712) | (0.0711) |
|  |  |  |  |  |  |  |  |  |  |  |  |
| 2015 | -0.410*** | -0.152* | -0.152* | -0.413*** | -0.154* | -0.155* | -0.154* | -0.154* | -0.154* | -0.154* | -0.154* |
|  | (0.0580) | (0.0764) | (0.0763) | (0.0579) | (0.0765) | (0.0764) | (0.0764) | (0.0765) | (0.0765) | (0.0765) | (0.0764) |
|  |  |  |  |  |  |  |  |  |  |  |  |
| 2016 | -0.376*** | -0.134† | -0.134† | -0.381*** | -0.134† | -0.135† | -0.134† | -0.134† | -0.135† | -0.134† | -0.135† |
|  | (0.0564) | (0.0767) | (0.0766) | (0.0567) | (0.0773) | (0.0773) | (0.0772) | (0.0773) | (0.0773) | (0.0773) | (0.0772) |
|  |  |  |  |  |  |  |  |  |  |  |  |
| 2017 | -0.192** | 0.0163 | 0.0162 | -0.196** | 0.0158 | 0.0153 | 0.0157 | 0.0158 | 0.0155 | 0.0160 | 0.0154 |
|  | (0.0617) | (0.0751) | (0.0750) | (0.0619) | (0.0754) | (0.0754) | (0.0754) | (0.0754) | (0.0754) | (0.0755) | (0.0753) |
|  |  |  |  |  |  |  |  |  |  |  |  |
| 2018 | -0.0966† | 0.0751 | 0.0751 | -0.101† | 0.0743 | 0.0735 | 0.0742 | 0.0743 | 0.0739 | 0.0745 | 0.0738 |
|  | (0.0527) | (0.0739) | (0.0738) | (0.0528) | (0.0739) | (0.0738) | (0.0738) | (0.0739) | (0.0739) | (0.0739) | (0.0738) |
|  |  |  |  |  |  |  |  |  |  |  |  |
| 2019 | 0.0633 | 0.223*** | 0.223*** | 0.0590 | 0.224*** | 0.223** | 0.223*** | 0.224*** | 0.223** | 0.224*** | 0.223** |
|  | (0.0527) | (0.0659) | (0.0658) | (0.0529) | (0.0661) | (0.0660) | (0.0660) | (0.0661) | (0.0661) | (0.0661) | (0.0660) |
|  |  |  |  |  |  |  |  |  |  |  |  |
| MDMA | 0.0158 | 0.0457 | 0.0481 | 0.0244 | 0.0560 | 0.298* | 0.0569 | 0.0560 | 0.0559 | 0.0553 | 0.0584 |
|  | (0.0425) | (0.0487) | (0.0486) | (0.0437) | (0.0506) | (0.116) | (0.0506) | (0.0506) | (0.0506) | (0.0507) | (0.0504) |
|  |  |  |  |  |  |  |  |  |  |  |  |
| LCPU | -0.0323 | 0.0281 | 0.117 |  |  |  |  |  |  |  |  |
|  | (0.0416) | (0.0493) | (0.0914) |  |  |  |  |  |  |  |  |
|  |  |  |  |  |  |  |  |  |  |  |  |
| Psychological Distress Level |  | 0.158*** | 0.160*** |  | 0.158*** | 0.161*** | 0.159*** | 0.158*** | 0.159*** | 0.158*** | 0.160*** |
|  |  | (0.00261) | (0.00275) |  | (0.00260) | (0.00278) | (0.00275) | (0.00261) | (0.00261) | (0.00264) | (0.00267) |
|  |  |  |  |  |  |  |  |  |  |  |  |
| LCPU * Distress |  |  | -0.00628 |  |  |  |  |  |  |  |  |
|  |  |  | (0.00564) |  |  |  |  |  |  |  |  |
|  |  |  |  |  |  |  |  |  |  |  |  |
| Psilocybin |  |  |  | -0.0539 | 0.0204 | 0.0185 | 0.0756 | 0.0204 | 0.0198 | 0.0201 | 0.0205 |
|  |  |  |  | (0.0438) | (0.0536) | (0.0532) | (0.104) | (0.0536) | (0.0536) | (0.0536) | (0.0533) |
|  |  |  |  |  |  |  |  |  |  |  |  |
| DMT |  |  |  | -0.595 | -0.539 | -0.516 | -0.532 | -0.774 | -0.509 | -0.538 | -0.526 |
|  |  |  |  | (0.416) | (0.487) | (0.482) | (0.486) | (1.136) | (0.486) | (0.488) | (0.484) |
|  |  |  |  |  |  |  |  |  |  |  |  |
| Ayahuasca |  |  |  | -1.105 | -1.480 | -1.465 | -1.475 | -1.478 | 71.92 | -1.493 | -1.468 |
|  |  |  |  | (0.857) | (1.186) | (1.166) | (1.182) | (1.186) | (.) | (1.191) | (1.182) |
|  |  |  |  |  |  |  |  |  |  |  |  |
| Peyote/Mescaline |  |  |  | -0.106 | 0.0761 | 0.0750 | 0.0750 | 0.0762 | 0.0787 | 0.00448 | 0.0723 |
|  |  |  |  | (0.0697) | (0.0887) | (0.0879) | (0.0883) | (0.0887) | (0.0888) | (0.188) | (0.0874) |
|  |  |  |  |  |  |  |  |  |  |  |  |
| LSD |  |  |  | -0.0193 | -0.0214 | -0.0208 | -0.0212 | -0.0214 | -0.0223 | -0.0211 | 0.0852 |
|  |  |  |  | (0.0519) | (0.0583) | (0.0576) | (0.0582) | (0.0582) | (0.0585) | (0.0583) | (0.104) |
|  |  |  |  |  |  |  |  |  |  |  |  |
| MDMA * Distress |  |  |  |  |  | -0.0164* |  |  |  |  |  |
|  |  |  |  |  |  | (0.00697) |  |  |  |  |  |
|  |  |  |  |  |  |  |  |  |  |  |  |
| Psilocybin * Distress |  |  |  |  |  |  | -0.00386 |  |  |  |  |
|  |  |  |  |  |  |  | (0.00634) |  |  |  |  |
|  |  |  |  |  |  |  |  |  |  |  |  |
| DMT * Distress |  |  |  |  |  |  |  | 0.0139 |  |  |  |
|  |  |  |  |  |  |  |  | (0.0754) |  |  |  |
|  |  |  |  |  |  |  |  |  |  |  |  |
| Ayahuasca * Distress |  |  |  |  |  |  |  |  | -12.61 |  |  |
|  |  |  |  |  |  |  |  |  | (.) |  |  |
|  |  |  |  |  |  |  |  |  |  |  |  |
| Peyote/Mescaline * Distress |  |  |  |  |  |  |  |  |  | 0.00518 |  |
|  |  |  |  |  |  |  |  |  |  | (0.0124) |  |
|  |  |  |  |  |  |  |  |  |  |  |  |
| LSD * Distress |  |  |  |  |  |  |  |  |  |  | -0.00742 |
|  |  |  |  |  |  |  |  |  |  |  | (0.00633) |
|  |  |  |  |  |  |  |  |  |  |  |  |
| Constant | -0.631*** | -3.327*** | -3.343*** | -0.642*** | -3.321*** | -3.354*** | -3.328*** | -3.321*** | -3.323*** | -3.317*** | -3.335*** |
|  | (0.105) | (0.154) | (0.155) | (0.104) | (0.153) | (0.154) | (0.154) | (0.153) | (0.153) | (0.153) | (0.154) |
| Observations | 238275 | 93812 | 93812 | 238275 | 93812 | 93812 | 93812 | 93812 | 93812 | 93812 | 93812 |
| *R*2 |  |  |  |  |  |  |  |  |  |  |  |
| Source: 2008-2019 National Survey of Drug Use and Health, n=*458,372*  Standard errors in parentheses  a Men serve as the references category  b Single Serves as the reference category for marital statuses  c White, Non-Hispanic Serves as the reference category for race/ethnicity  d 2008 serves as the reference category for the year survey was taken  † *p* < 0.1, * *p* < 0.05, ** *p* < 0.01, *** *p* < 0.001 | | | | | | | | | | | |
